# Supplementary material for: Label-free dual-mode sensing platform based on target-regulated CRISPR–Cas12a activity for ochratoxin A in Morinda officinalis
Source: Royal Society of Chemistry journal article supplement (doi:10.1039/d3ay01025b), 2023-01-01
Supplement: d3ay01025b1.pdf [file d3ay01025b1.pdf]

1 **Label-free Dual-mode Sensing Platform Based on Target-regulated**

2 **CRISPR-Cas12a Activity for Ochratoxin A in *Morinda officinal***

3

4 **Huifeng Xu<sup>\*a</sup>, Rui Pan<sup>a</sup>, Weihua Huang<sup>a</sup>, and Xi Zhu<sup>\* b</sup>**

5

6

7

8

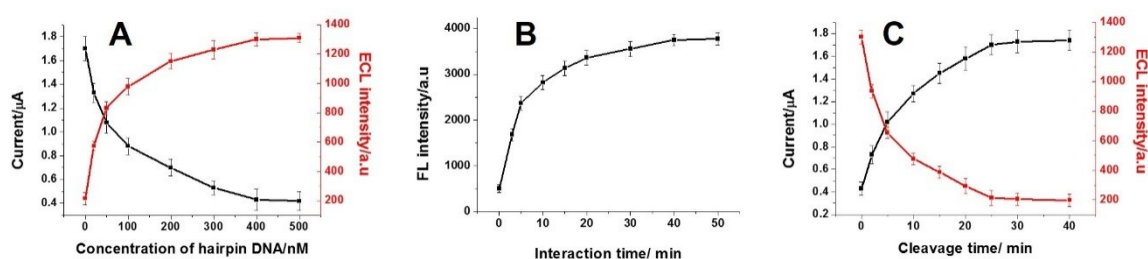

10 Fig. S1 Optimum conditions. A) The concentration of hairpin DNA; B) The  
11 interaction time of OTA and CRISPR-Cas12a; C) The cleavage time of hairpin DNA  
12 by CRISPR-Cas12a.

13

14

15

16

17

18

19

20

21

22

23

24

25

26

27

28

29

30

31

32

33

34

35

36 Table S1 Comparison of the developed dual-mode sensing platform with others for

37 OTA detection

| Methods                  | Linear range      | LOD                      | ref       |
|--------------------------|-------------------|--------------------------|-----------|
| Colorimetry              | 2.52–302.85 ng/mL | 2.019 ng/mL              | [1]       |
| Fluorescence             | 1 - 1000 ng/mL    | 0.63 ng/mL               | [2]       |
| Fluorescence             | 5–500 ng/mL       | 2.3 ng/mL                | [3]       |
| Fluorescence             | 0.015–100 ng/mL   | 5.4 ng/mL                | [4]       |
| Electrochemistry         | 0.01 -10.0 ng/mL  | 3 pg/mL                  | [5]       |
| Electrochemistry         | 0.05–10 ng/mL     | 50 pg/mL                 | [6]       |
| ECL                      | 0.0202–2.02 ng/mL | 4.84 ng/mL               | [7]       |
| ECL                      | 1–100 ng/mL       | 0.89 ng/mL               | [8]       |
| Electrochemistry and ECL | 1-5000 pg/mL      | 0.29 pg/mL<br>0.37 pg/mL | This work |

38

39

40

41 [1] Y. He, F. Tian, J. Zhou, Q. Zhao, R. Fu, B. Jiao, Colorimetric aptasensor for ochratoxin A detection  
42 based on enzyme-induced gold nanoparticle aggregation, *Journal of Hazardous Materials*, 388 (2020)  
43 121758.

44 [2] B. Han, C. Fang, L. Sha, M. Jalalah, M.S. Al-Assiri, F.A. Harraz, Y. Cao, Cascade strand  
45 displacement reaction-assisted aptamer-based highly sensitive detection of ochratoxin A, *Food*  
46 *Chemistry*, 338 (2021) 127827.

47 [3] Z. Guo, J. Tian, C. Cui, Y. Wang, H. Yang, M. Yuan, H. Yu, A label-free aptasensor for turn-on  
48 fluorescent detection of ochratoxin a based on SYBR gold and single walled carbon nanohorns, *Food*  
49 *Control*, 123 (2021) 107741.

50 [4] C. Wang, J. Qian, K. Wang, K. Wang, Q. Liu, X. Dong, C. Wang, X. Huang, Magnetic-fluorescent-  
51 targeting multifunctional aptasensor for highly sensitive and one-step rapid detection of ochratoxin A,  
52 *Biosensors and Bioelectronics*, 68 (2015) 783-790.

53 [5] Y. Wang, G. Ning, Y. Wu, S. Wu, B. Zeng, G. Liu, X. He, K. Wang, Facile combination of beta-  
54 cyclodextrin host-guest recognition with exonuclease-assistant signal amplification for sensitive  
55 electrochemical assay of ochratoxin A, *Biosensors and Bioelectronics*, 124-125 (2019) 82-88.

56 [6] Y. Hou, N. Long, B. Jia, X. Liao, M. Yang, L. Fu, L. Zhou, P. Sheng, W. Kong, Development of a  
57 label-free electrochemical aptasensor for ultrasensitive detection of ochratoxin A, *Food Control*, 135  
58 (2022) 108833.

59 [7] M. Wei, C. Wang, E. Xu, J. Chen, X. Xu, W. Wei, S. Liu, A simple and sensitive  
60 electrochemiluminescence aptasensor for determination of ochratoxin A based on a nicking  
61 endonuclease-powered DNA walking machine, *Food Chemistry*, 282 (2019) 141-146.

62 [8] M. Jia, B. Jia, X. Liao, L. Shi, Z. Zhang, M. Liu, L. Zhou, D. Li, W. Kong, A CdSe@CdS quantum  
63 dots based electrochemiluminescence aptasensor for sensitive detection of ochratoxin A, Chemosphere,  
64 287 (2022) 131994.  
65
